# Supplementary figures and images for: Liquid phase calorimetry and adsorption analyses of zeolite beta acidity
Source: Royal Society of Chemistry journal article supplement (doi:10.1039/b715142j), 2008-01-01

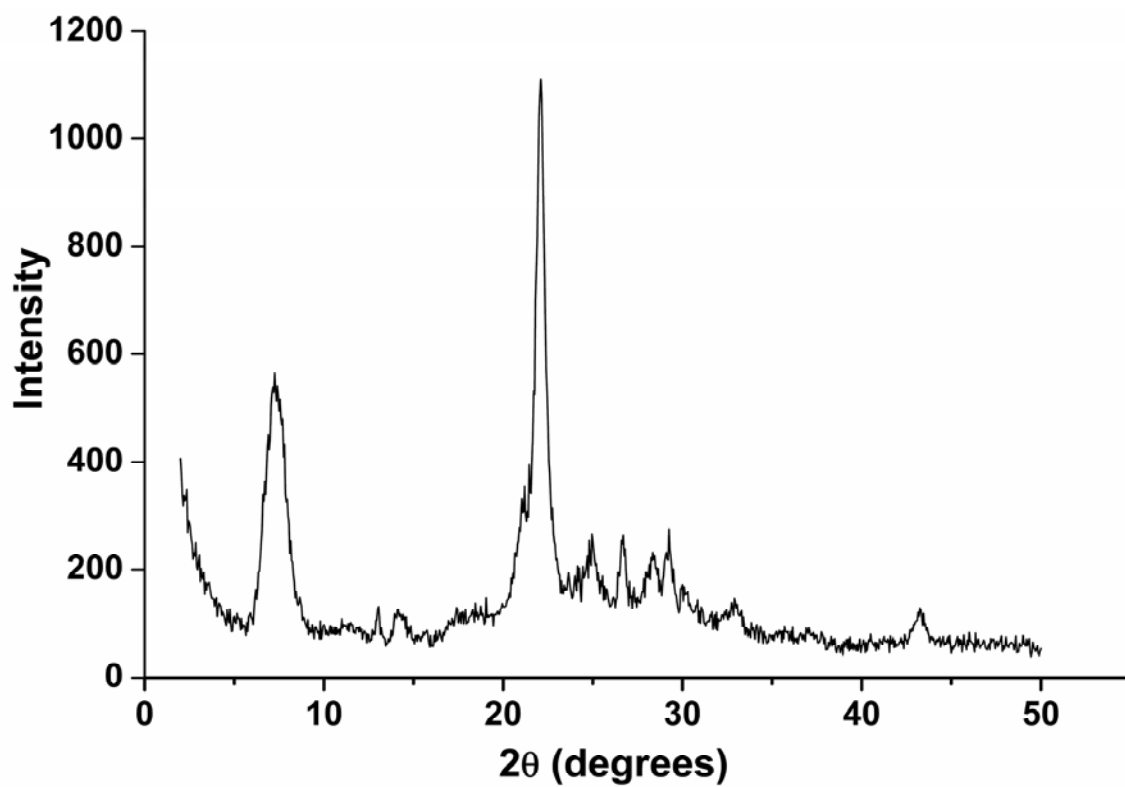

Fig.: XRD pattern of zeolite NH<sub>4</sub>BEA.

Supplement: b715142j.pdf [file b715142j.pdf]
